# Supplementary material for: IDEAL-CRT: A Phase 1/2 Trial of Isotoxic Dose-Escalated Radiation Therapy and Concurrent Chemotherapy in Patients With Stage II/III Non-Small Cell Lung Cancer
Source: PubMed Central journal article supplement — Int J Radiat Oncol Biol Phys. 2016 Aug 1;95(5):1367–77. doi: 10.1016/j.ijrobp.2016.03.031 (PMC4959796; doi:10.1016/j.ijrobp.2016.03.031), 2016-08-01

Supplementary Figure 1: **Group 1 Escalation of the** esophageal dose constraint **in Group 1 escalation.**

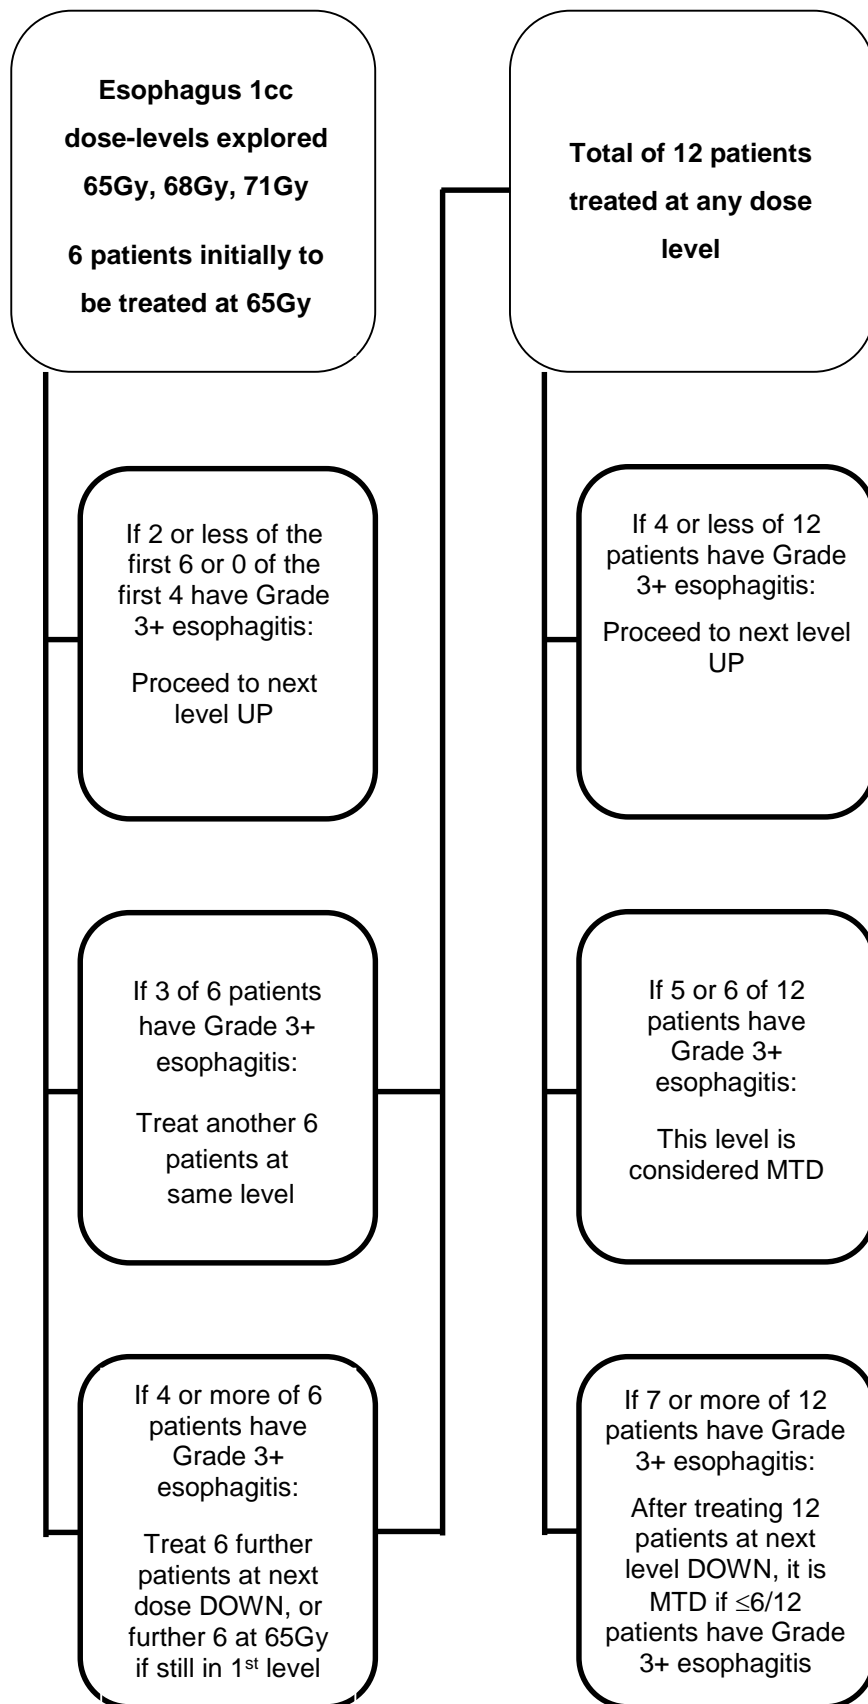

Supplement: mmc1.pdf [file mmc1.pdf]
