# Supplementary material for: IDEAL-CRT: A Phase 1/2 Trial of Isotoxic Dose-Escalated Radiation Therapy and Concurrent Chemotherapy in Patients With Stage II/III Non-Small Cell Lung Cancer
Source: PubMed Central journal article supplement — Int J Radiat Oncol Biol Phys. 2016 Aug 1;95(5):1367–77. doi: 10.1016/j.ijrobp.2016.03.031 (PMC4959796; doi:10.1016/j.ijrobp.2016.03.031), 2016-08-01
Supplement: mmc2.pdf [file mmc2.pdf]

**Supplementary Table 1: Treatment administration (safety population).**

|                                                       |                               | <b>Group 1</b>    | <b>Group 2</b>        | <b>Total</b>      |
|-------------------------------------------------------|-------------------------------|-------------------|-----------------------|-------------------|
|                                                       |                               | <b>N=35</b>       | <b>N=47</b>           | <b>N=82</b>       |
| <b>Chemotherapy: Cisplatin</b>                        |                               |                   |                       |                   |
| <b>Cycles completed*</b>                              | 1 cycle                       | 0                 | 1 <sup>†</sup> (2%)   | 1 (1%)            |
|                                                       | 2 cycles                      | 35 (100%)         | 46 <sup>§</sup> (98%) | 81 (99%)          |
| <b>Relative Dose Intensity (RDI)<sup>††</sup> (%)</b> | Mean (SD)                     | 96.8 (5.1)        | 97.1 (5.6)            | 97.0 (5.4)        |
|                                                       | Median (Range)                | 98.6 (76.9-101.9) | 99.8 (79.5-103.8)     | 99.6 (76.9-103.8) |
| <b>Dose delays</b>                                    | At least one delay            | 2 (6%)            | 2 (4%)                | 4 (5%)            |
| <b>Dose reductions</b>                                | At least one reduction        | 2 (6%)            | 2 (4%)                | 4 (5%)            |
| <b>Chemotherapy: Vinorelbine</b>                      |                               |                   |                       |                   |
| <b>Cycles completed</b>                               | 1 cycle                       | 0                 | 1 (2%)                | 1 (1%)            |
|                                                       | 2 cycles                      | 35 (100%)         | 46 (98%)              | 81 (99%)          |
| <b>RDI<sup>††</sup> (%)</b>                           | Mean (SD)                     | 96.8 (9.5)        | 96.9 (5.9)            | 96.9 (7.6)        |
|                                                       | Median (Range)                | 99.6 (56.4-108.8) | 98.7 (79.8-110.5)     | 99.0 (56.4-110.5) |
| <b>Dose Delays</b>                                    | At least one delay            | 6 (17%)           | 4 (9%)                | 10 (12%)          |
| <b>Dose Reductions</b>                                | At least one reduction        | 2 (6%)            | 5 (11%)               | 7 (8%)            |
| <b>RT compliance</b>                                  |                               |                   |                       |                   |
| <b>RT duration (wks)</b>                              | Completed RT                  | 34 (97%)          | 47 (100%)             | 81 (99%)          |
|                                                       | Did not complete <sup>*</sup> | 1 (3%)            | 0                     | 1 (1%)            |
|                                                       | (Median, range)               | 5.6 (5.3-6.1)     | 5.6 (5.1-6.6)         | 5.6 (5.1-6.6)     |

\* Figure 1 (CONSORT) provides reasons for stopping or not starting RT/chemotherapy.

<sup>†</sup> Except where otherwise indicated, figures show numbers of patients.

<sup>††</sup> Relative dose intensity: administered dose relative to planned dose.

<sup>§</sup> One patient received carboplatin rather than cisplatin for the second cycle.
