# Supplementary material for: IDEAL-CRT: A Phase 1/2 Trial of Isotoxic Dose-Escalated Radiation Therapy and Concurrent Chemotherapy in Patients With Stage II/III Non-Small Cell Lung Cancer
Source: PubMed Central journal article supplement — Int J Radiat Oncol Biol Phys. 2016 Aug 1;95(5):1367–77. doi: 10.1016/j.ijrobp.2016.03.031 (PMC4959796; doi:10.1016/j.ijrobp.2016.03.031), 2016-08-01
Supplement: mmc4.pdf [file mmc4.pdf]

**Supplementary Table 3: Latency of Grade 3-5 toxicities after start of RT (safety population).**

|                                                                   | <b>Group 1<br/>(N=35)</b> | <b>Group 2<br/>(N=47)</b> | <b>Total<br/>(N=82)</b> |
|-------------------------------------------------------------------|---------------------------|---------------------------|-------------------------|
| <b>Grade <math>\geq</math>3 toxicities &lt;3 months:</b>          | <b>16 (46%)</b>           | <b>25 (53%)</b>           | <b>41 (50%)</b>         |
| Grade 3                                                           | 15                        | 18                        | 33                      |
| Grade 4                                                           | 1                         | 6                         | 7                       |
| Grade 5                                                           | 0                         | 1                         | 1                       |
| <b>Grade <math>\geq</math>3 toxicities at 3 to &lt;12 months:</b> | <b>11 (31%)</b>           | <b>19 (40%)</b>           | <b>30 (37%)</b>         |
| Grade 3                                                           | 7                         | 17                        | 24                      |
| Grade 4                                                           | 3                         | 1                         | 4                       |
| Grade 5                                                           | 1                         | 1                         | 2                       |
| <b>Grade <math>\geq</math>3 toxicities at 12 months or after:</b> | <b>13 (37%)</b>           | <b>19 (40%)</b>           | <b>32 (39%)</b>         |
| Grade 3                                                           | 11                        | 17                        | 28                      |
| Grade 4                                                           | 1                         | 2                         | 3                       |
| Grade 5                                                           | 1                         | 0                         | 1                       |
