# Supplementary material for: IDEAL-CRT: A Phase 1/2 Trial of Isotoxic Dose-Escalated Radiation Therapy and Concurrent Chemotherapy in Patients With Stage II/III Non-Small Cell Lung Cancer
Source: PubMed Central journal article supplement — Int J Radiat Oncol Biol Phys. 2016 Aug 1;95(5):1367–77. doi: 10.1016/j.ijrobp.2016.03.031 (PMC4959796; doi:10.1016/j.ijrobp.2016.03.031), 2016-08-01
Supplement: mmc5.pdf [file mmc5.pdf]

**Supplementary Table 4: Prescribed tumor doses and a summary of normal tissue dosimetry<sup>†</sup>.**

|                                 |                | Group 1 (N= 34)            |                            |                            | Group 2 (N= 46)  | Total (N=80)     |
|---------------------------------|----------------|----------------------------|----------------------------|----------------------------|------------------|------------------|
|                                 |                | Cohort 1 – 65Gy<br>(N= 12) | Cohort 2 – 68Gy<br>(N= 12) | Cohort 3 – 71Gy<br>(N= 10) |                  |                  |
| <b>PTV</b>                      |                |                            |                            |                            |                  |                  |
| <b>Prescribed dose (Gy)</b>     | Mean (SD)      | 66.5 (2.7)                 | 69.3 (2.3)                 | 71.2 (1.6)                 | 67.0 (3.7)       | 67.8 (3.5)       |
|                                 | Median (range) | 65.7 (63.0-72.9)           | 69.4 (64.6-72.7)           | 72.0 (68.0-72.9)           | 65.5 (63.0-73.0) | 67.6 (63.0-73.0) |
| <b>Lungs-GTV</b>                |                |                            |                            |                            |                  |                  |
| <b>V<sub>20Gy</sub> (%)</b>     | Mean (SD)      | 26.0 (3.9)                 | 27.3 (4.9)                 | 25.0 (4.3)                 | 27.4 (6.1)       | 26.9 (5.4)       |
|                                 | Median (range) | 27.3 (19.1-32.4)           | 25.7 (18.9-35.0)           | 24.6 (19.4-32.8)           | 26.8 (14.1-46.4) | 26.8 (14.1-46.4) |
| <b>V<sub>40Gy</sub> (%)</b>     | Mean (SD)      | 16.7 (3.3)                 | 16.2 (1.4)                 | 14.5 (2.6)                 | 16.7 (3.8)       | 16.4 (3.3)       |
|                                 | Median (range) | 16.8 (11.5-22.5)           | 16.1 (14.2-19.6)           | 14.9 (8.4-17.7)            | 16.4 (6.0-25.7)  | 16.2 (6.0-25.7)  |
| <b>V<sub>60Gy</sub> (%)</b>     | Mean (SD)      | 8.6 (2.7)                  | 6.8 (1.3)                  | 7.8 (2.7)                  | 7.5 (2.0)        | 7.6 (2.1)        |
|                                 | Median (range) | 8.9 (4.4-12.0)             | 6.8 (4.3-9.0)              | 7.3 (3.2-12.7)             | 7.5 (2.9-11.3)   | 7.5 (2.9-12.7)   |
| <b>Mean dose (Gy)</b>           | Mean (SD)      | 16.9 (2.0)                 | 16.3 (1.7)                 | 15.8 (1.6)                 | 17.2 (2.8)       | 16.9 (2.4)       |
|                                 | Median (range) | 17.1 (12.5-20.6)           | 16.5 (13.3-19.1)           | 15.8 (13.0-18.8)           | 17.6 (9.4-24.3)  | 17.1 (9.4-24.3)  |
| <b>EQD<sub>2mean</sub> (Gy)</b> | Mean (SD)      | 14.8 (1.9)                 | 14.1 (1.1)                 | 13.8 (1.4)                 | 14.9 (2.3)       | 14.6 (2.1)       |
|                                 | Median (range) | 15.2 (10.7-18.8)           | 14.4 (11.7-15.5)           | 13.9 (11.0-15.6)           | 15.6 (7.9-21.2)  | 14.9 (7.9-21.2)  |
| <b>Oesophagus</b>               |                |                            |                            |                            |                  |                  |
| <b>D<sub>0.1cc</sub> (Gy)</b>   | Mean (SD)      | 66.5 (1.3)                 | 69.3 (1.0)                 | 72.3 (0.7)                 | 57.8 (13.8)      | 62.7 (12.0)      |
|                                 | Median (range) | 66.1 (65.3-70.1)           | 69.0 (68.4-71.5)           | 72.1 (71.5-73.6)           | 63.7 (16.3-69.5) | 65.9 (16.3-73.6) |
| <b>D<sub>1.0cc</sub> (Gy)</b>   | Mean (SD)      | 65.0 (0.0)                 | 68.0 (0.0)                 | 71.0 (0.0)                 | 54.9 (15.6)      | 60.4 (13.5)      |

|                              |                |                  |                  |                  |                  |                  |
|------------------------------|----------------|------------------|------------------|------------------|------------------|------------------|
|                              | Median (range) | 65.0 (64.9-65.0) | 68.0 (68.0-68.0) | 71.0 (71.0-71.1) | 62.5 (14.2-68.0) | 65.0 (14.2-71.1) |
| <b>V<sub>20Gy</sub> (%)</b>  | Mean (SD)      | 49.4 (12.9)      | 43.4 (6.5)       | 52.3 (10.3)      | 41.3 (14.6)      | 44.2 (13.4)      |
|                              | Median (range) | 49.6 (22.6-69.8) | 42.0 (31.7-57.5) | 50.2 (38.9-71.3) | 43.7 (0.0-63.6)  | 44.6 (0.0-71.3)  |
| <b>V<sub>40Gy</sub> (%)</b>  | Mean (SD)      | 33.7 (12.4)      | 33.1 (8.3)       | 39.4 (11.7)      | 25.5 (17.4)      | 29.6 (15.6)      |
|                              | Median (range) | 34.9 (9.7-50.5)  | 33.2 (20.2-47.0) | 42.0 (22.7-59.9) | 26.5 (0.0-59.3)  | 30.8 (0.0-59.9)  |
| <b>V<sub>60Gy</sub> (%)</b>  | Mean (SD)      | 18.4 (9.5)       | 20.9 (8.8)       | 24.8 (8.5)       | 13.1 (13.1)      | 16.6 (12.2)      |
|                              | Median (range) | 20.5 (5.2-31.3)  | 21.2 (7.5-34.3)  | 25.3 (13.4-37.0) | 10.3 (0.0-50.0)  | 16.2 (0.0-50.0)  |
| <b>Mean dose (Gy)</b>        | Mean (SD)      | 25.8 (6.9)       | 24.8 (4.5)       | 30.1 (5.8)       | 21.6 (8.4)       | 23.8 (7.9)       |
|                              | Median (range) | 26.9 (11.7-34.9) | 25.3 (16.5-31.1) | 30.0 (20.9-38.3) | 21.5 (4.7-39.2)  | 24.1 (4.7-39.2)  |
| <b>Heart</b>                 |                |                  |                  |                  |                  |                  |
| <b>V<sub>20Gy</sub> (%)</b>  | Mean (SD)      | 15.3 (12.0)      | 14.9 (14.8)      | 15.0 (15.4)      | 23.0 (16.5)      | 19.7 (15.8)      |
|                              | Median (range) | 12.1 (0.7-38.6)  | 12.4 (0.4-51.7)  | 11.1 (0.2-48.8)  | 21.7 (0.0-62.3)  | 16.9 (0.0-62.3)  |
| <b>V<sub>40Gy</sub> (%)</b>  | Mean (SD)      | 7.8 (6.6)        | 8.0 (10.8)       | 7.6 (8.7)        | 11.7 (9.4)       | 10.0 (9.2)       |
|                              | Median (range) | 6.7 (0.0-21.4)   | 5.4 (0.0-38.0)   | 5.3 (0.0-27.2)   | 11.1 (0.0-42.8)  | 7.6 (0.0-42.8)   |
| <b>V<sub>60Gy</sub> (%)</b>  | Mean (SD)      | 2.8 (2.8)        | 3.6 (5.8)        | 2.6 (3.6)        | 5.0 (4.8)        | 4.2 (4.6)        |
|                              | Median (range) | 2.3 (0.0-7.6)    | 1.7 (0.0-20.2)   | 1.3 (0.0-11.5)   | 3.5 (0.0-20.7)   | 2.8 (0.0-20.7)   |
| <b>D<sub>100%</sub> (Gy)</b> | Mean (SD)      | 0.4 (0.2)        | 0.3 (0.2)        | 0.3 (0.4)        | 0.6 (0.7)        | 0.5 (0.6)        |
|                              | Median (range) | 0.3 (0.1-0.9)    | 0.3 (0.0-0.7)    | 0.3 (0.0-1.1)    | 0.5 (0.0-3.3)    | 0.3 (0.0-3.3)    |
| <b>D<sub>67%</sub> (Gy)</b>  | Mean (SD)      | 2.1 (1.4)        | 1.8 (2.3)        | 2.7 (3.2)        | 4.2 (4.9)        | 3.4 (4.1)        |
|                              | Median (range) | 1.5 (0.8-5.7)    | 1.2 (0.4-8.9)    | 1.5 (0.5-9.7)    | 2.5 (0.3-18.9)   | 1.7 (0.3-18.9)   |
| <b>D<sub>33%</sub> (Gy)</b>  | Mean (SD)      | 7.8 (8.4)        | 9.6 (12.1)       | 8.2 (9.7)        | 13.1 (12.1)      | 11.2 (11.4)      |
|                              | Median (range) | 4.3 (1.9-25.7)   | 6.3 (1.1-43.9)   | 4.4 (1.1-31.3)   | 8.6 (0.6-50.7)   | 6.1 (0.6-50.7)   |
| <b>Mean dose (Gy)</b>        | Mean (SD)      | 9.8 (5.7)        | 9.4 (7.9)        | 9.3 (7.6)        | 13.5 (8.0)       | 11.8 (7.8)       |

|                               |                |                  |                  |                  |                 |                 |
|-------------------------------|----------------|------------------|------------------|------------------|-----------------|-----------------|
|                               | Median (range) | 9.2 (2.8-21.0)   | 8.5 (1.4-29.3)   | 7.6 (2.0-25.5)   | 13.5 (0.5-32.3) | 10.7 (0.5-32.3) |
| <b>Brachial Plexus*</b>       |                |                  |                  |                  |                 |                 |
| <b>D<sub>0.1cc</sub> (Gy)</b> | Mean (SD)      | 35.9 (26.1)      | 21.5 (29.2)      | 42.1 (30.2)      | 21.7 (25.0)     | 26.2 (27.0)     |
|                               | Median (range) | 39.9 (0.6-66.4)  | 3.0 (0.8-72.9)   | 62.0 (2.1-69.0)  | 4.7 (0.4-65.4)  | 9.9 (0.4-72.9)  |
| <b>D<sub>1.0cc</sub> (Gy)</b> | Mean (SD)      | 30.0 (24.9)      | 12.3 (21.5)      | 34.2 (26.2)      | 18.1 (22.2)     | 20.9 (23.6)     |
|                               | Median (range) | 29.0 (0.6-59.9)  | 2.7 (0.8-71.9)   | 33.7 (1.8-65.7)  | 4.3 (0.4-64.0)  | 5.1 (0.4-71.9)  |
| <b>D<sub>30%</sub> (Gy)</b>   | Mean (SD)      | 26.2 (23.6)      | 12.5 (21.0)      | 27.1 (23.0)      | 12.9 (17.6)     | 16.5 (20.3)     |
|                               | Median (range) | 20.9 (0.5-57.0)  | 2.3 (0.6-67.4)   | 22.9 (1.3-64.1)  | 3.5 (0.3-62.2)  | 3.9 (0.3-67.4)  |
| <b>V<sub>20Gy</sub> (%)</b>   | Mean (SD)      | 43.5 (45.8)      | 13.6 (24.6)      | 42.3 (36.8)      | 17.6 (27.8)     | 23.8 (33.3)     |
|                               | Median (range) | 27.7 (0.0-100.0) | 0.0 (0.0-78.0)   | 45.7 (0.0-97.0)  | 0.0 (0.0-92.6)  | 0.0 (0.0-100.0) |
| <b>V<sub>40Gy</sub> (%)</b>   | Mean (SD)      | 25.8 (33.7)      | 8.8 (18.9)       | 19.3 (25.5)      | 7.9 (18.1)      | 12.1 (22.7)     |
|                               | Median (range) | 4.0 (0.0-99.7)   | 0.0 (0.0-61.3)   | 5.7 (0.0-73.0)   | 0.0 (0.0-74.7)  | 0.0 (0.0-99.7)  |
| <b>V<sub>60Gy</sub> (%)</b>   | Mean (SD)      | 2.3 (4.5)        | 4.8 (13.2)       | 7.9 (15.8)       | 2.8 (8.9)       | 3.6 (10.1)      |
|                               | Median (range) | 0.0 (0.0-14.6)   | 0.0 (0.0-45.5)   | 1.0 (0.0-47.5)   | 0.0 (0.0-50.2)  | 0.0 (0.0-50.2)  |
| <b>Spinal Cord</b>            |                |                  |                  |                  |                 |                 |
| <b>D<sub>0.1cc</sub> (Gy)</b> | Mean (SD)      | 38.6 (8.1)       | 37.4 (9.0)       | 42.4 (5.1)       | 31.9 (10.2)     | 35.0 (9.9)      |
|                               | Median (range) | 41.0 (17.0-47.0) | 41.3 (18.3-47.0) | 45.0 (33.3-47.0) | 35.1 (3.4-46.4) | 37.7 (3.4-47.0) |
| <b>D<sub>1.0cc</sub> (Gy)</b> | Mean (SD)      | 34.9 (7.5)       | 34.8 (8.0)       | 39.2 (5.0)       | 30.0 (10.2)     | 32.5 (9.5)      |
|                               | Median (range) | 37.2 (16.6-42.5) | 37.7 (17.4-43.3) | 40.2 (32.1-44.4) | 33.6 (3.1-45.4) | 35.9 (3.1-45.4) |

† Data not available for 4 patients (1 x Group 1, 3 x Group 2), a further 2 patients had no Brachial Plexus data (1 x Group 1, 1 x Group 2)

\* 6 patients received brachial plexus doses outside of the trial constraints. 4 were within tolerance before online central review. 1 occurred before the study mandated brachial plexus constraints. 1 was accepted as a minor protocol deviation.
